# Supplementary material for: Kinetics of the OH + NO 2 reaction: Effect of water vapour and new parameterisation for global modelling
Source: Copernicus journal article supplement (doi:10.5194/acp-2019-1103), 2019-12-03
Supplement: Supplementary file 1 [file acp-2019-1103-supplement.pdf]

# Kinetics of the OH + NO<sub>2</sub> reaction: Effect of water vapour and new parameterisation for global modelling.

Damien Amedro<sup>1</sup>, Matias Berasategui<sup>1</sup>, Arne J. C. Buncan<sup>1</sup>, Andrea Pozzer<sup>1</sup>, Jos Lelieveld<sup>1</sup> and John N. Crowley<sup>1</sup>

5 <sup>1</sup>Division of Atmospheric Chemistry, Max-Planck-Institute for Chemistry, 55128 Mainz, Germany

Correspondence to: John N. Crowley (john.crowley@mpic.de)

## Supplementary information

10

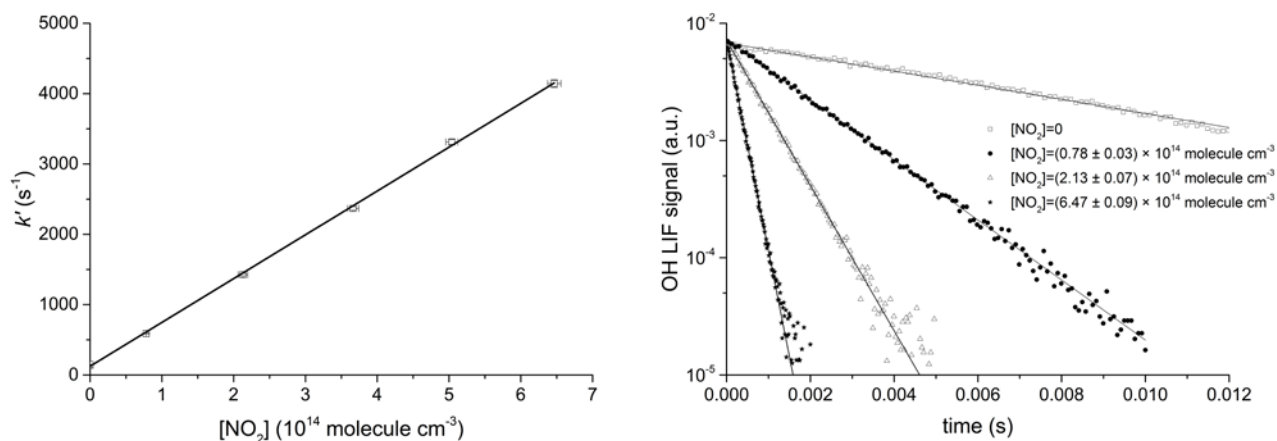

**Figure S1.** *Left panel:* Plots of  $k'$  versus  $[\text{NO}_2]$  at 500 Torr He and 292 K. The lines are least-squares fits to the data using Eq. (2) (see main text). Error bars are  $2\sigma$  statistical only. *Right panel:* Exponential decay of the OH LIF signal in 500 Torr He, at 292 K, and at four different  $\text{NO}_2$  concentrations. The solid lines are fits to the datasets using Eq. (1) (see main text).  
15

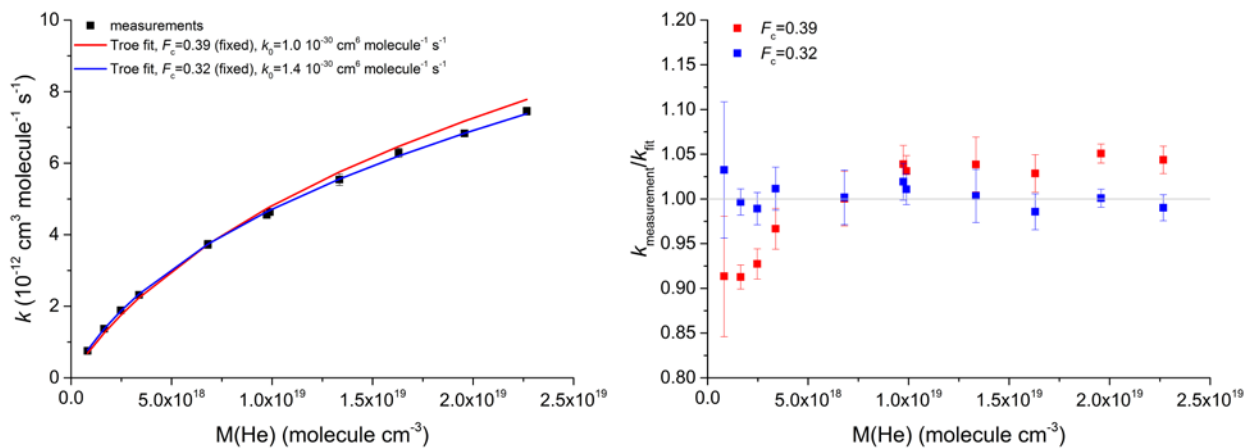

5 **Figure S2.** *Left panel:* Measurements of  $k_1$  as a function of He density. The blue line corresponds to a fit using equation (2) whereby  $F_c$  was fixed to 0.32 leading to  $k_0^{\text{He}} = 1.4 \times 10^{-30} \text{ cm}^6 \text{ molecule}^{-2} \text{ s}^{-1}$ . The red line corresponds to a fit using equation (2) whereby  $F_c$  was fixed to 0.39 leading to  $k_0^{\text{He}} = 1.0 \times 10^{-30} \text{ cm}^6 \text{ molecule}^{-2} \text{ s}^{-1}$ . Other parameters were fixed to:  $m = 3.1$ ,  $k_\infty = 6.3 \times 10^{-11} \text{ cm}^3 \text{ molecule}^{-1} \text{ s}^{-1}$  and  $n = 0$ . *Right panel:* Ratio of the measured rate constant vs. the parametrisation using  $F_c = 0.39$  and  $F_c = 0.32$

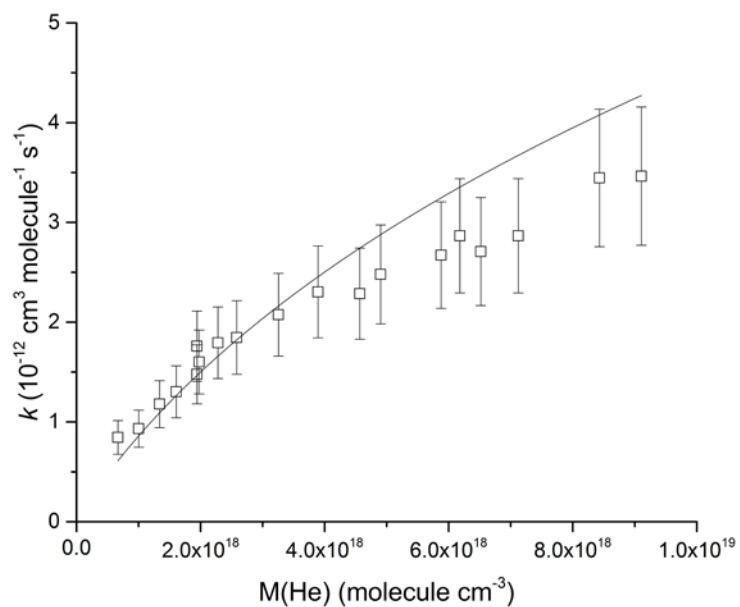

**Figure S3.** Comparison with previous experimental data. The data points are measurements by Morley and Smith (1972) at  
5 300 K, the solid line represents our parametrisation.

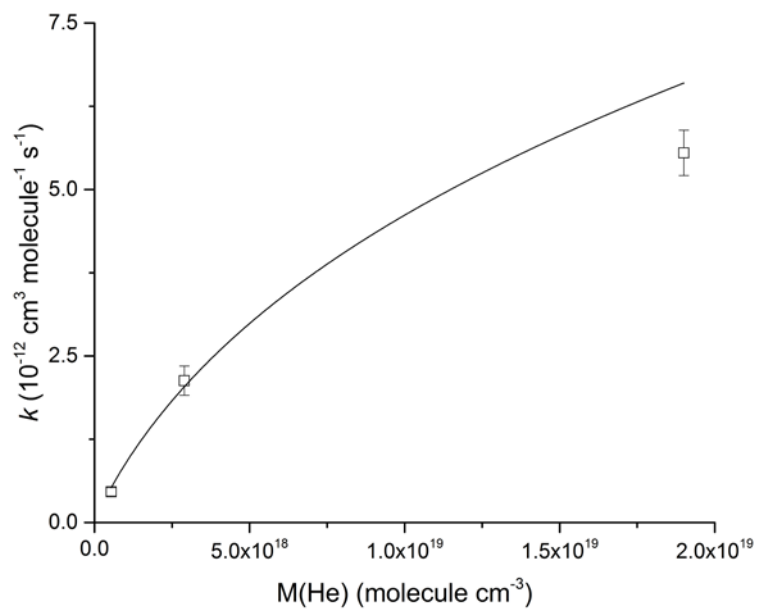

**Figure S4.** Comparison with previous experimental data. The data points are measurements by Wine et al. (1979) at 297 K, the solid line represents our parametrisation.

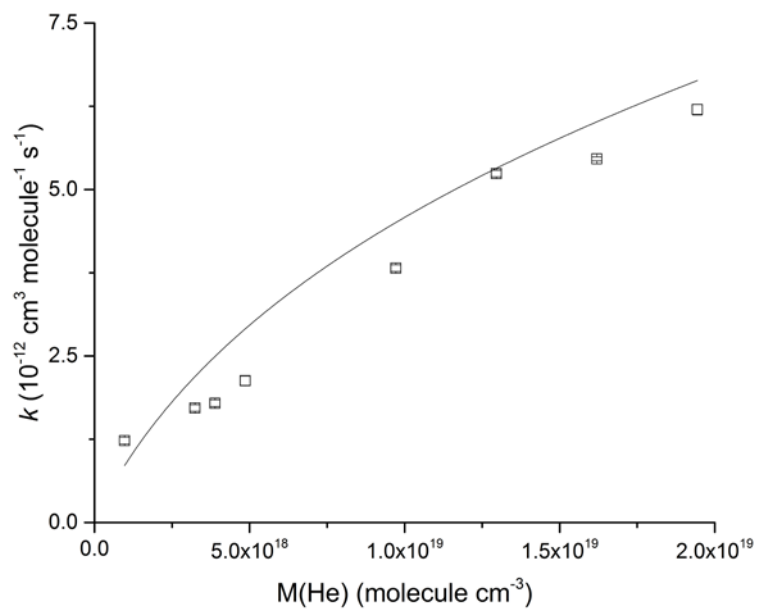

**Figure S5.** Comparison with previous experimental data. The data points are measurements by D'Ottone et al. (2001) at 298 K, the solid line represents our parametrisation.

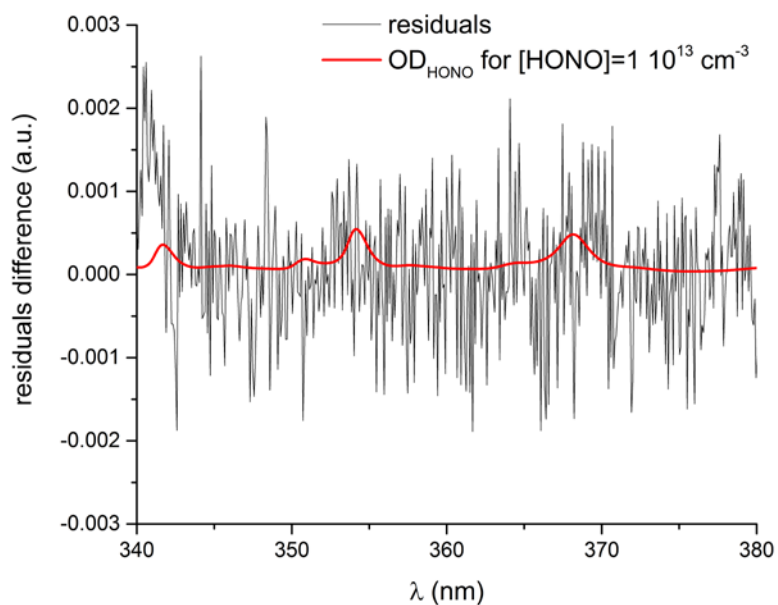

**Figure S6.** Spectrum of the difference between the residuals of NO<sub>2</sub> spectra with and without H<sub>2</sub>O ([H<sub>2</sub>O] =  $4.5 \times 10^{17}$  molecule cm<sup>-3</sup>, [NO<sub>2</sub>] =  $1.7 \times 10^{15}$  molecule cm<sup>-3</sup>) recorded at 50 Torr He, at room temperature. The red line corresponds to absorption by HONO at a concentration of  $1 \times 10^{13}$  molecule cm<sup>-3</sup>.

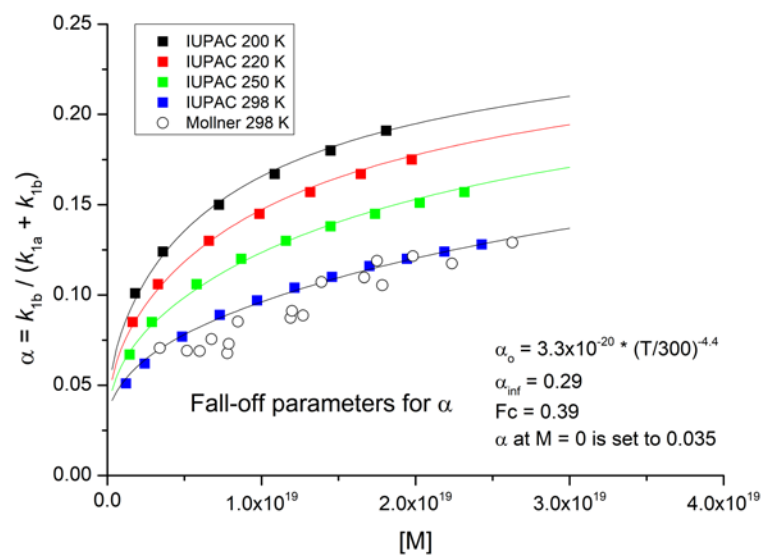

5 **Figure S7.** Parameterisation of the temperature and pressure dependent yield of HOONO in the reaction between OH and NO<sub>2</sub>.

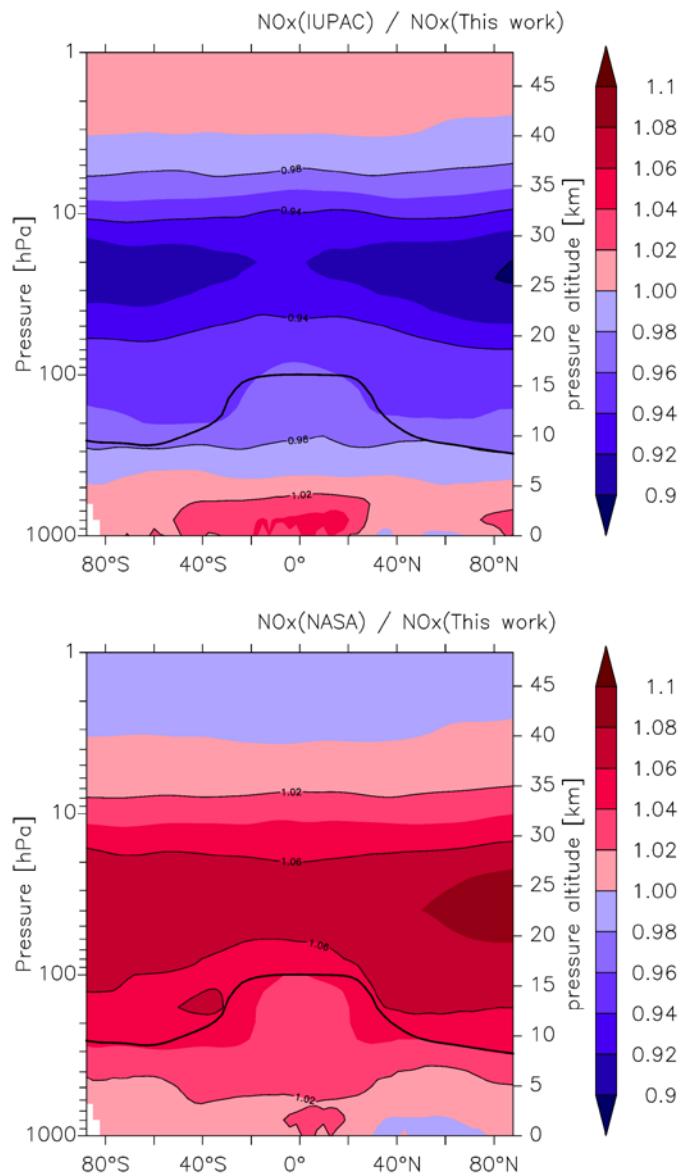

**Figure S8.** Effect of different parameterisations of  $k_1$  on the global (zonal and yearly averaged) concentration of  $\text{NO}_x$ . The upper panel plots  $[\text{NO}_x]_{\text{IUPAC}} / [\text{NO}_x]_{\text{this work}}$ , the lower panel plots  $[\text{NO}_x]_{\text{NASA}} / [\text{NO}_x]_{\text{this work}}$ . The black line represents the model tropopause.



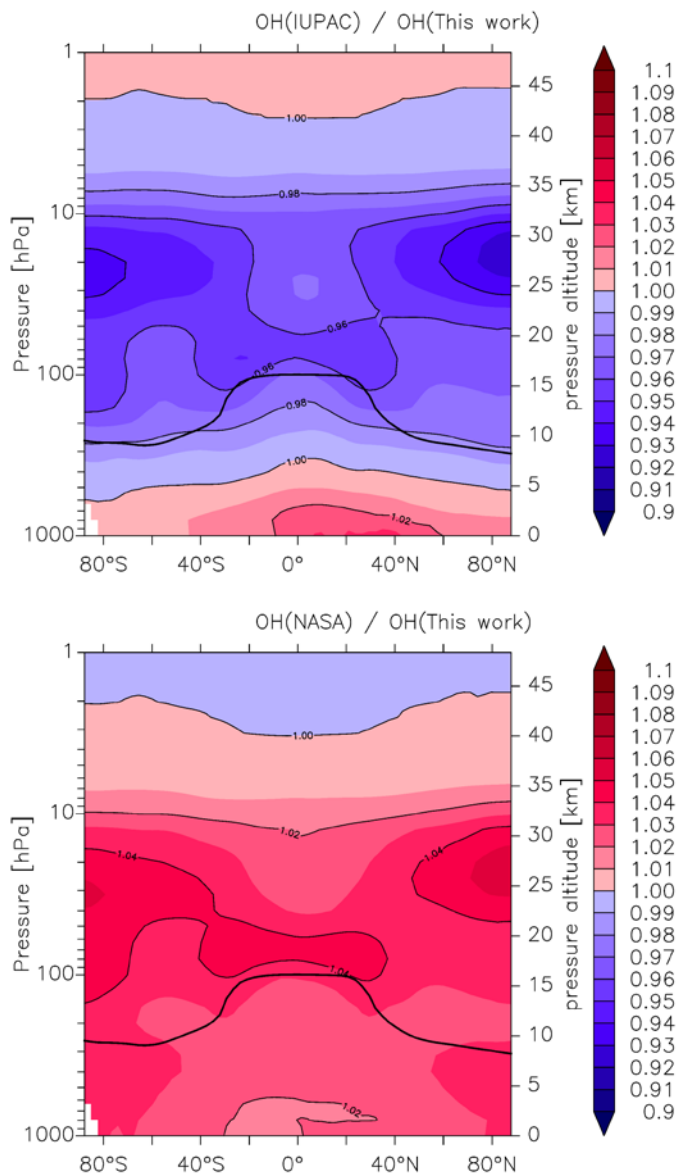

**Figure S9.** Effect of different parameterisations of  $k_1$  on the global (zonal and yearly averaged) concentration of the hydroxyl radical, [OH]. The upper panel plots  $[\text{OH}]_{\text{IUPAC}} / [\text{OH}]_{\text{this work}}$ , the lower panel plots  $[\text{OH}]_{\text{NASA}} / [\text{OH}]_{\text{this work}}$ . The black line represents the model tropopause.

## References

D'Ottone, L., Campuzano-Jost, P., Bauer, D., and Hynes, A. J.: A pulsed laser photolysis-pulsed laser induced fluorescence study of the kinetics of the gas-phase reaction of OH with NO<sub>2</sub>, J. Phys. Chem. A, 105, 10538-10543, 2001.

- 5 Morley, C., and Smith, I. W. M.: Rate measurements of reactions of OH by resonance absorption. 1. Reactions of OH with NO<sub>2</sub> and NO, Journal of the Chemical Society-Faraday Transactions II, 68, 1016-&, 10.1039/f29726801016, 1972.

Wine, P. H., Kreutter, N. M., and Ravishankara, A. R.: Flash photolysis-resonance fluorescence kinetics study of the reaction OH + NO<sub>2</sub> + M -> HNO<sub>3</sub> + M, J. Phys. Chem., 83, 3191-3195, 1979.
