# Supplementary material for: Kinetics of the OH + NO 2 reaction: Effect of water vapour and new parameterisation for global modelling
Source: Copernicus journal article supplement (doi:10.5194/acp-2019-1103), 2019-12-03
Supplement: Supplementary file [file acp-2019-1103-AC2-supplement.pdf]

The following contains the comments of the referee (black), our replies (blue) indicating changes that will be made to the revised document (red).

## **Reviewer #2**

The manuscript describes the determination of the rate constant of the OH + NO<sub>2</sub> reaction with He and N<sub>2</sub> as bath gases in presence and absence of gaseous H<sub>2</sub>O. A quasi-static reaction cell was used, and OH was produced by pulsed laser photolysis of HNO<sub>3</sub>, H<sub>2</sub>O<sub>2</sub>, or O<sub>3</sub>/H<sub>2</sub>O mixtures. Pseudo-first order conditions with respect to [OH] were applied. The OH concentration was monitored time-resolved by laser-induced fluorescence, and the (crucial) NO<sub>2</sub> concentration was carefully determined with two different absorption-spectroscopic approaches. A notable increase of the OH + NO<sub>2</sub> rate constant in He and N<sub>2</sub> when H<sub>2</sub>O is present was observed and associated with a particularly high efficiency of H<sub>2</sub>O for collisional stabilization of the HNO<sub>3</sub> product. Non-linear mixing rules for the collisional efficiencies seem to apply. Very careful parameterizations and statistical evaluations of the experimental results, including earlier literature data, were performed and discussed in great detail, also with respect to branching between HONO<sub>2</sub> and HOONO as reaction products. The newly parameterized rate constant is incorporated in a 3D chemical transport model, and effects on quantities such as the atmospheric HNO<sub>3</sub>/NO<sub>2</sub> ratio, the atmospheric concentration of OH, or the HOONO/HO<sub>2</sub>NO<sub>2</sub> ratio are assessed. All in all, this is a very nice paper bridging high-level state-of-the-art laboratory measurements with global atmospheric modeling. So the topic is at the very heart of ACP, and I recommend publication essentially 'as is' with only very few, very minor points to be considered by the authors:

We thank the reviewer for the careful review and the positive assessment of our manuscript.

line 35: 'gases' should probably read 'gas' **Corrected**

line 68: 'O3-H2O' should probably better read 'O3/H2O' **Corrected**

Tables 1 and 2: please specify/explain M

In Table 1, we modified the caption below with:

**Molecular density M(He) in units of 10<sup>18</sup> molecule cm<sup>-3</sup>**

In Table 2, we modified in the caption,

**Molecular density M(He-H<sub>2</sub>O) or M(N<sub>2</sub>-H<sub>2</sub>O) in units of 10<sup>18</sup> molecule cm<sup>-3</sup>**

Fig. 1, figure caption: please give the parameters m and n

The figure 1 caption now reads:

The solid line is a fit to our data using Eqn. (4) with  $k_0 = 1.4 \times 10^{-30} \text{ cm}^6 \text{ molecule}^{-2} \text{ s}^{-1}$ ,  $k_\infty = 6.3 \times 10^{-11} \text{ cm}^3 \text{ molecule}^{-1} \text{ s}^{-1}$ ,  $F_c = 0.32$ ,  $m=3.1$  and  $n=0$ .

Fig. 2, figure caption: please give the parameter n

The figure 2 caption now reads:

The black line is our parameterisation with  $k_0 = 1.4 \times 10^{-30} \text{ cm}^6 \text{ molecule}^{-2} \text{ s}^{-1}$ ,  $k_\infty = 6.3 \times 10^{-11} \text{ cm}^3 \text{ molecule}^{-1} \text{ s}^{-1}$ ,  $m = 3.1$ ,  $n=0$  and  $F_c = 0.32$ .
